# Supplementary material for: The susceptibility of disulfide bonds towards radiation damage may be explained by S⋯O interactions
Source: PubMed Central journal article supplement (PMC7467163; doi:10.1107/s2052252520008520), 2020-07-24
Supplement: m-07-00825-sup1.pdf [file m-07-00825-sup1.pdf]

# IUCrJ

**Volume 7 (2020)**

**Supporting information for article:**

**The susceptibility of disulfide bonds towards radiation damage  
may be explained by S···O interactions**

**Rajasri Bhattacharyya, Jesmita Dhar, Shubhra Ghosh Dastidar, Pinak  
Chakrabarti and Manfred S. Weiss**

**Table S1** Charges<sup>a</sup> on the S atom and the total energy<sup>b</sup> of the system (as calculated using Hartree-Fock theory with basis set 6-31++G(2d,2p)) at different values of  $\theta$  and  $\phi$ , and S...O distance of 3.08 Å<sup>c</sup>.

| $\phi$ (°)       | $\theta$ (°) <sup>a</sup> |                          |                         |
|------------------|---------------------------|--------------------------|-------------------------|
|                  | 90                        | 45                       | 0                       |
| -60 <sup>b</sup> | 0.0<br>(-0.297, 0.005)    | 0.63<br>(-0.187, -0.063) | 5.02<br>(-0.233, 0.066) |
| 0                | 0.94<br>(-0.163, -0.084)  | 3.89<br>(-0.192, 0.038)  |                         |
| +50              | 0.31<br>(-0.074, -0.070)  | 2.01<br>(-0.066, -0.158) |                         |

<sup>a</sup> The charges on distant and neighboring S atoms ( $S_{\gamma'}$  and  $S_{\gamma}$ , respectively) are given in parenthesis.

<sup>b</sup> ( $E_{\text{RHF}}$ ) (a.u) obtained from the program was first converted into kcal/mol. The value at a given ( $\theta$ ,  $\phi$ ) was then expressed relative to that at (90°, -60°), *i.e.*,  $\Delta E = E_{\text{RHF}(\theta,\phi)} - E_{\text{RHF}(90,-60)}$ .

<sup>c</sup> Calculations were also done at two distances on either side of 3.08 Å, and the resulting charges are: (-0.319, 0.014) at 2.9 Å and (-0.284, -0.001) at 3.2 Å.

**Table S2** Charges on the S atoms and energy of interaction when the amide group is rotated about the C=O axis, keeping the disulphide moiety fixed (using DFT/B3LYP/6-31G++(2d,2p) level of theory).

| Position | Dihedral angle(°) <sup>a</sup> | Charge on distant S atom | Charge on proximal S atom |
|----------|--------------------------------|--------------------------|---------------------------|
| 1        | -12                            | -0.155                   | 0.026                     |
| 2        | -42                            | -0.154                   | 0.019                     |
| 3        | -72                            | -0.151                   | -0.001                    |
| 4        | -102                           | -0.146                   | 0.001                     |
| 5        | -132                           | -0.142                   | -0.011                    |
| 6        | -162                           | -0.143                   | -0.002                    |
| 7        | -180(or +180)                  | -0.139                   | -0.002                    |
| 8        | +150                           | -0.138                   | 0.016                     |
| 9        | +120                           | -0.151                   | 0.013                     |
| 10       | +90                            | -0.148                   | 0.001                     |
| 11       | +60                            | -0.151                   | 0.015                     |
| 12       | +30                            | -0.157                   | 0.031                     |
| 13       | 0                              | -0.157                   | 0.029                     |

<sup>a</sup> The virtual dihedral angle is defined by  $S_{\gamma} \cdots O-C-CH_3$ . The position 1 corresponds to what is shown in Fig. 2.

**Table S3** Second order perturbation theory analysis of the Fock matrix in NBO basis (using Hartree-Fock theory) of the model shown in Fig. 2 representing elastase

| $S_{\gamma} \cdots O$<br>distance (Å) | Donor (i) | Type   | Acceptor<br>(j)          | Type       | E(2) <sup>a</sup><br>(kcal/mol) | $\epsilon(j)-\epsilon(i)$ <sup>b</sup><br>(a.u) |
|---------------------------------------|-----------|--------|--------------------------|------------|---------------------------------|-------------------------------------------------|
| 2.9                                   | O         | LP (1) | $S_{\gamma}-S_{\gamma}'$ | $\sigma^*$ | 1.42                            | 1.25                                            |
|                                       |           | LP (2) |                          |            | 0.18                            | 0.72                                            |
| 3.08                                  | O         | LP (1) | $S_{\gamma}-S_{\gamma}'$ | $\sigma^*$ | 0.62                            | 1.25                                            |
|                                       |           | LP (2) |                          |            | 0.08                            | 0.71                                            |
| 3.2                                   | O         | LP (1) | $S_{\gamma}-S_{\gamma}'$ | $\sigma^*$ | 0.35                            | 1.25                                            |
|                                       |           | LP (2) |                          |            | 0.05                            | 0.71                                            |

<sup>a</sup> E(2) means energy of hyperconjugative interaction (stabilization energy). The default threshold of 0.05 kcal/mol was used.

<sup>b</sup> Energy difference between donor (i) and acceptor (j) NBO orbitals.
